# Supplementary material for: Controlled Disassembly and Purification of Functional Viral Subassemblies Using Asymmetrical Flow Field-Flow Fractionation (AF4)
Source: MDPI journal article supplement (doi:10.3390/v10110579), 2018-10-23
Supplement: s1 [file s1]

## Controlled disassembly and purification of functional viral subassemblies using asymmetrical flow field-flow fractionation (AF4).

*Katri Eskelin and Minna M. Poranen*

Supplementary Figures S1-S7.

Supplementary Fig. S1. Preparation of NC inputs.

Supplementary Fig. S2. Control treatments and buffer backgrounds.

Supplementary Fig. S3.  $\phi 6$  retention in AF4.

Supplementary Fig. S4.  $\phi 6$  RNA elutes at the end of cross-flow gradient.

Supplementary Fig. S5. Refractionation and AF4 fractionation of purified  $\phi 6$  NC.

Supplementary Fig. S6. Purification of  $\phi 6$  NC by AF4.

Supplementary Fig. 7. Capacity of AF4-purified  $\phi 6$  NC to infect spheroplasts.

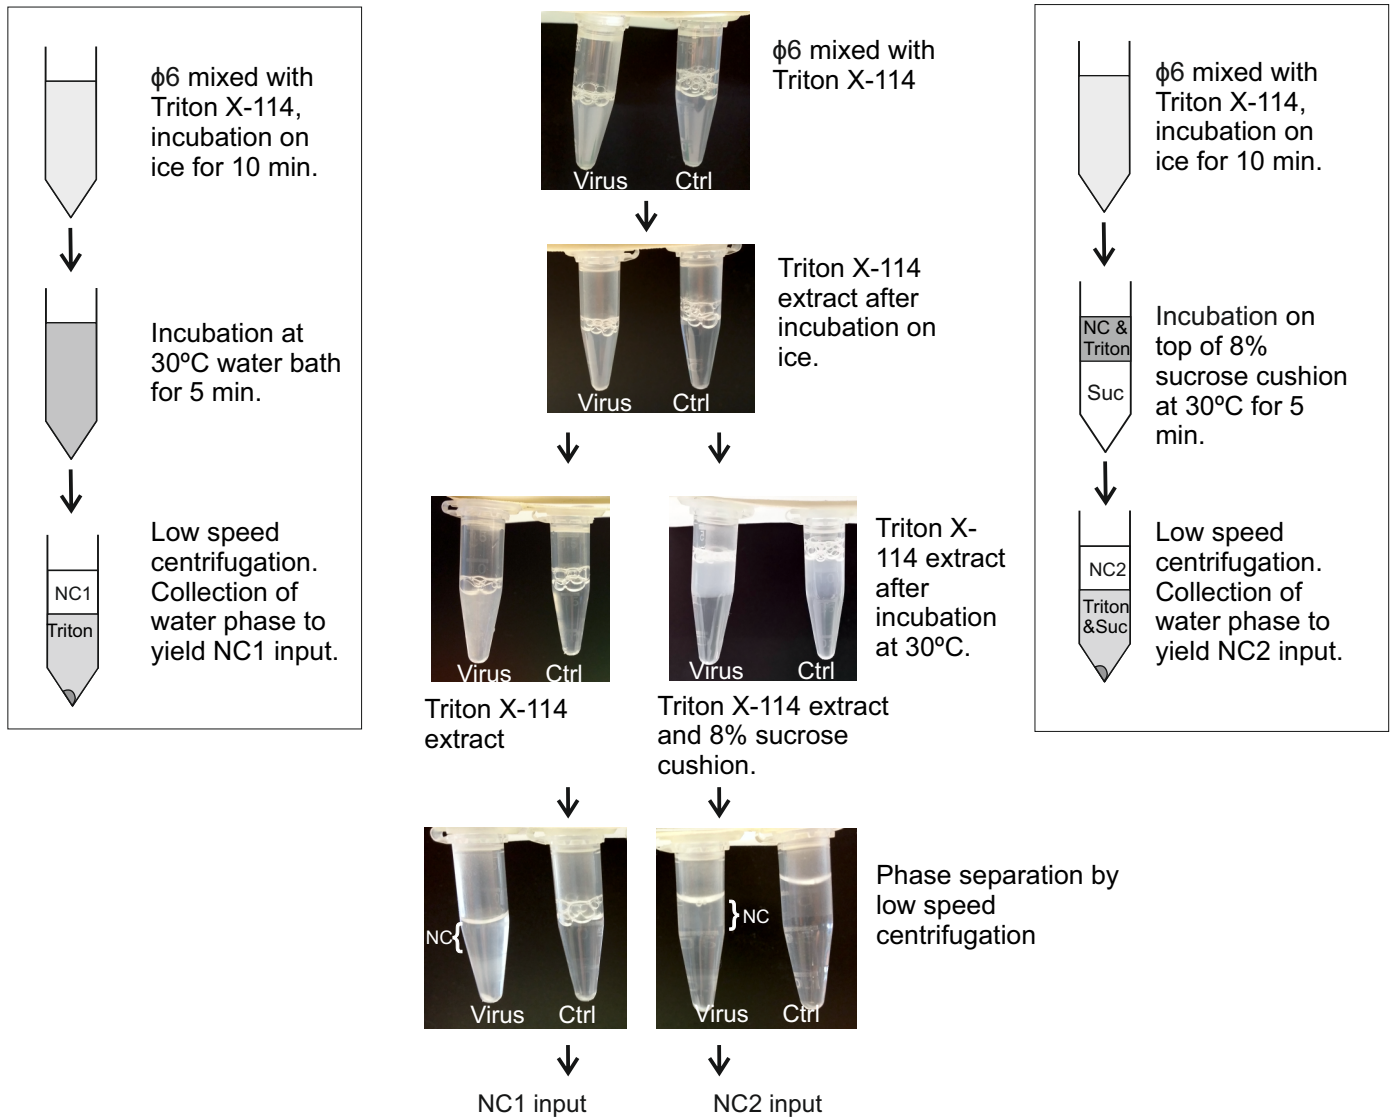

Supplementary Fig. S1. Preparation of NC inputs. Virus was first mixed with 1/3 volume of precondensed Triton X-114. In controls (Ctrl) the virus was replaced with buffer. After 10 min incubation on ice, the mixture was placed into a 30 °C water bath for phase separation (left). Phase separation was enhanced by a low speed centrifugation, after which the NC-containing water phase was collected to result in NC1 input. Alternatively, after incubation on ice, the mixture was layered on top of an 8% sucrose cushion and incubated in the 30 °C water bath (right). Phase separation was also obtained by a low speed centrifugation, after which the NC-containing water phase was collected to result in NC2 input.

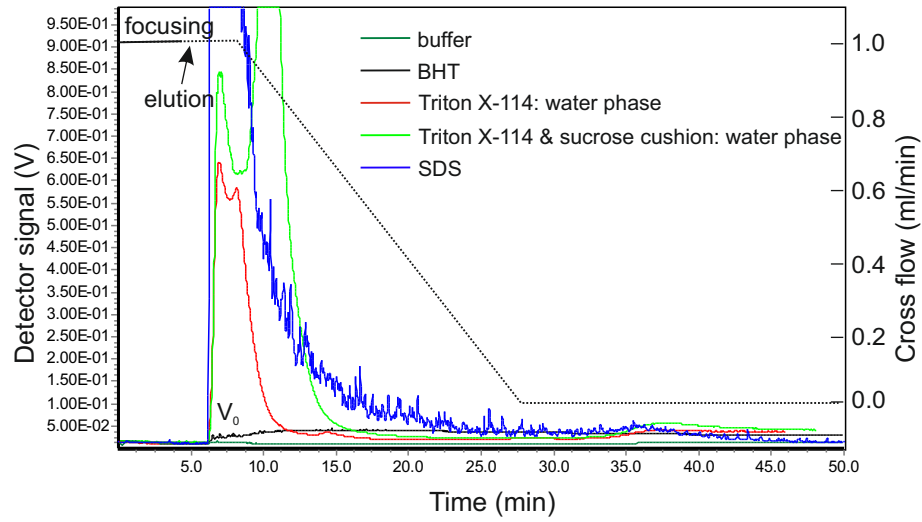

Supplementary Fig. S2. Control treatments and buffer backgrounds. Control treatments were performed without virus addition and resulting control samples were used for AF4 analysis. Signal intensity at 260 nm for SDS-, BHT-, and Triton X-114 treatments. For SDS-control, the high intensity peak at the beginning of elution was partially caused by a transient increase in the pressure that interfered UV measurement. The AF4 buffer used was 10 mM potassium phosphate (pH 7.2), 1 mM  $\text{MgCl}_2$ . Cross-flow elution gradient is shown with dashed line (right y-axis). Detector signal intensity was measured at 260 nm in volts (V) (left y-axis).  $V_0$  is the void peak.

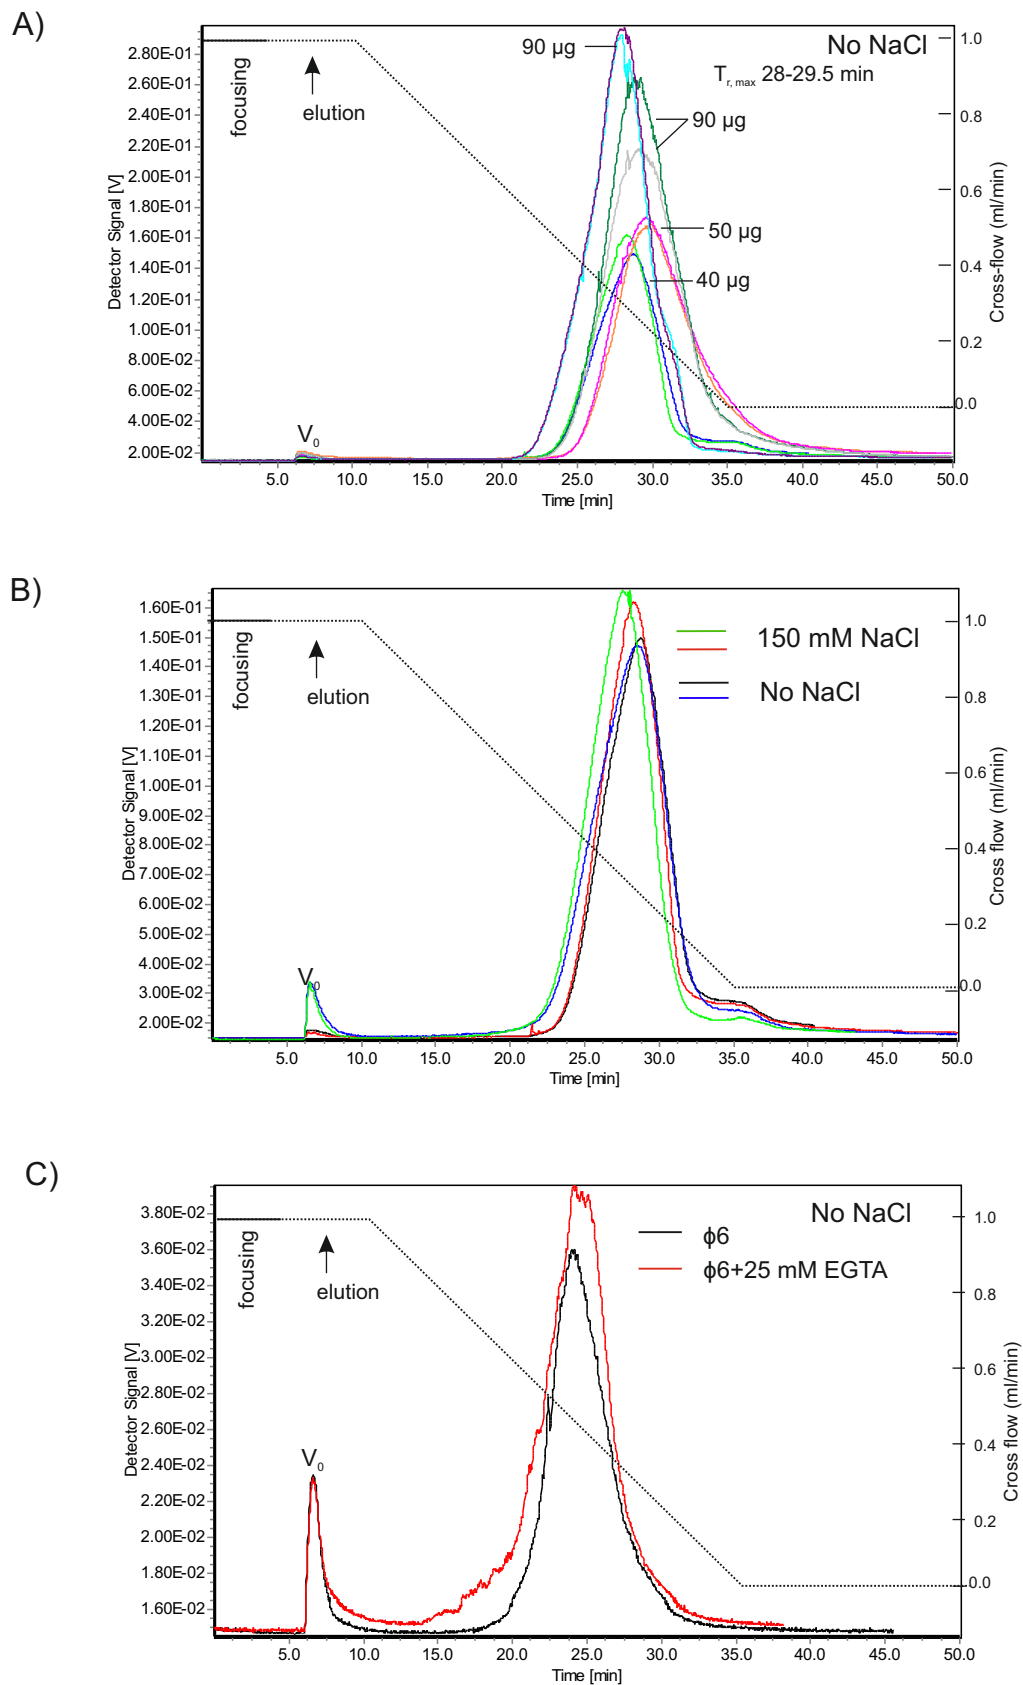

Supplementary Fig. S3.  $\phi 6$  retention in AF4. A) Day-to-day and batch-to-batch variation in retention. Fractograms present data obtained for two virus batches that were analysed in duplicate on four different days. Injected virus amounts varied from  $\sim 40$  to  $90 \mu\text{g}$ . B) Effect of NaCl in  $\phi 6$  retention. Analyzed virus amount was  $\sim 70 \mu\text{g}$ . C) Effect of 25 mM EGTA-treatment on elution of intact  $\phi 6$ . AF4 was performed using 20 mM potassium phosphate (pH 7.2), 1 mM  $\text{MgCl}_2$  buffer that lacked or contained 150 mM NaCl. Cross-flow elution gradient is shown with a dashed line (right y-axis). Detector signal intensity was measured at 260 nm in volts (V) (left y-axis).  $V_0$  is the void peak.



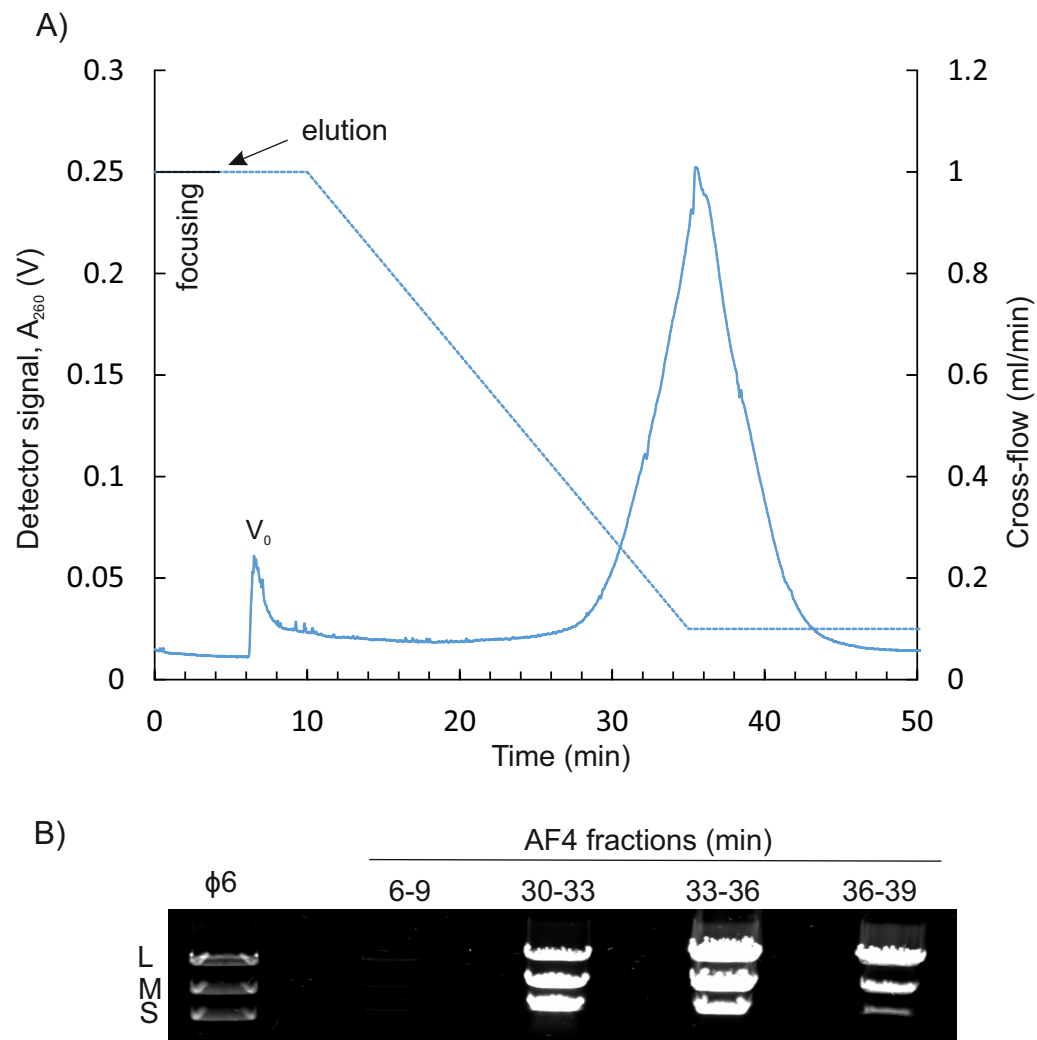

Supplementary Fig. S4.  $\phi 6$  RNA elutes at the end of cross-flow gradient. A) Elution of purified genomic RNA of  $\phi 6$  in AF4. UV detector signal at 260 nm is shown with a solid line in volts (V). Cross-flow gradient is shown with dashed line (right y-axis).  $V_0$  is the void peak. B) Agarose gel electrophoresis for the RNA content of the major peak and  $\phi 6$  input. Positions of genomic dsRNA molecules (L, M, S) are indicated on the left.

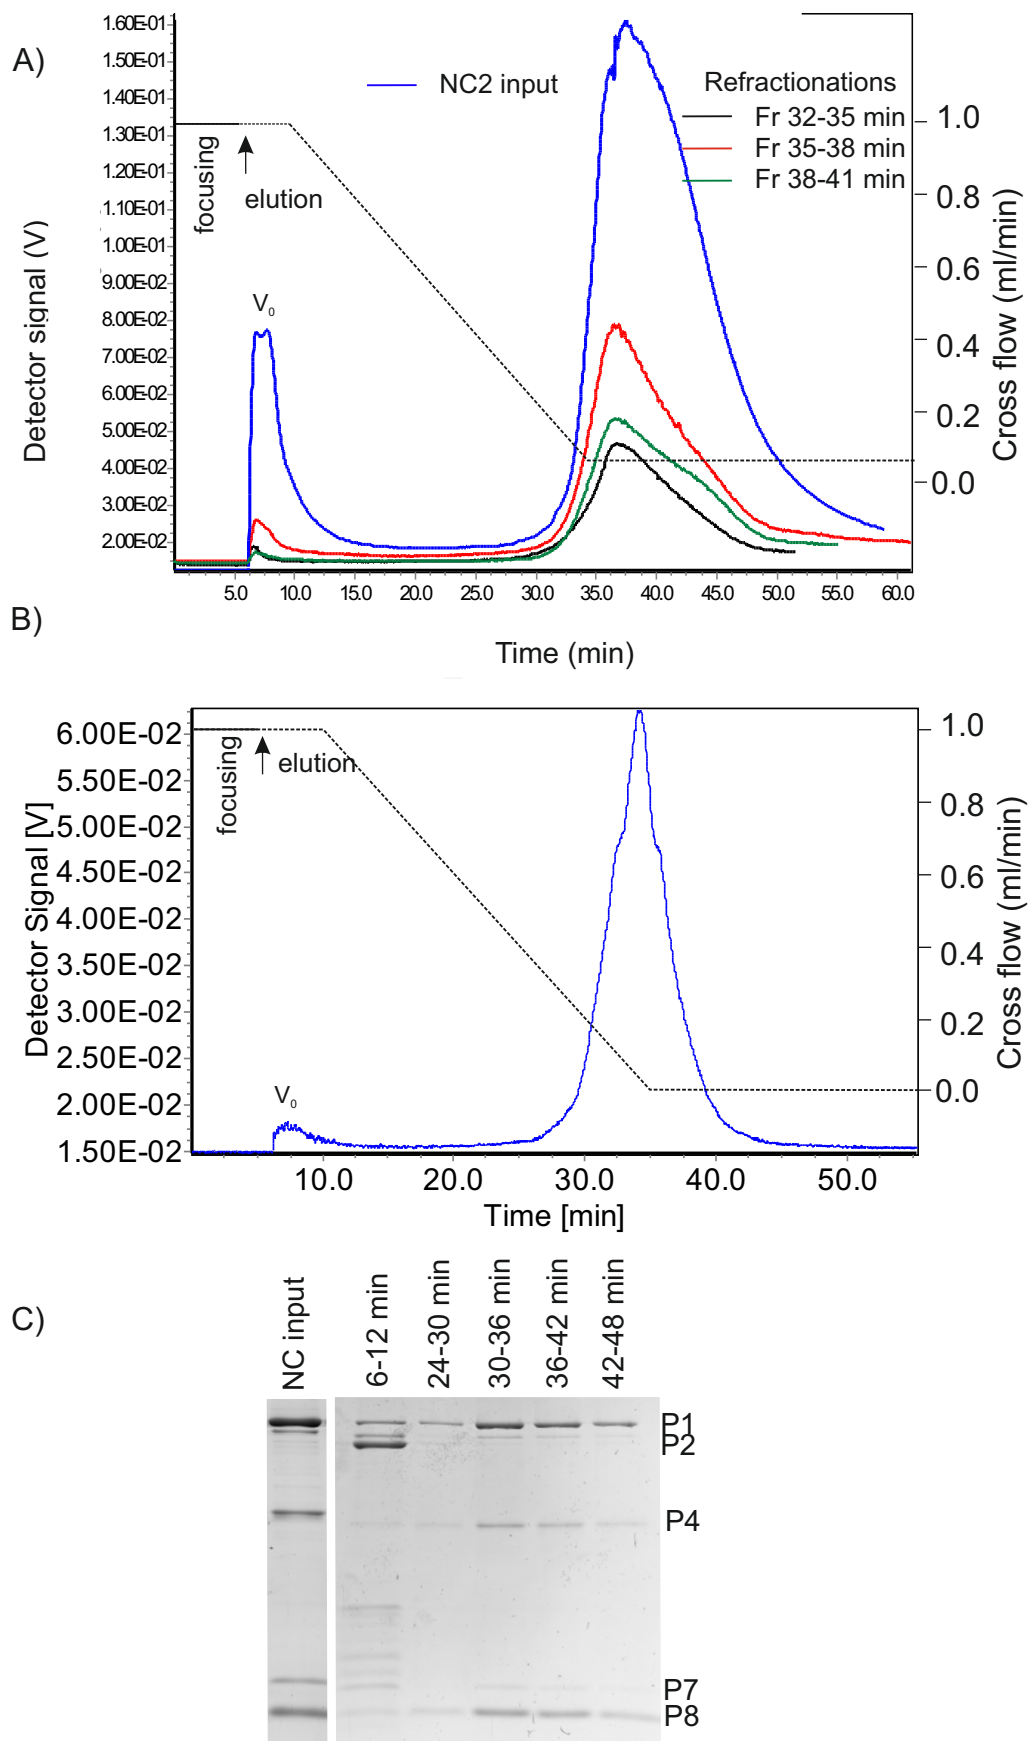

Supplementary Fig. S5. Refractionation and AF4 fractionation of purified  $\phi 6$  NC. A) Refractionation of AF4-purified NC2 input. Fractions representing the NC peak were re-injected to AF4 ( $\lambda$  500  $\mu$ l) and compared to the input. Elution time for the analysed fractions are indicated in the figure. B)  $\phi 6$  NC that had been pre-purified with anion exchange chromatography elutes at the end of the cross-flow gradient. UV signal that was measured in volts (V) at 260 nm is shown with a solid line (left y-axis). Cross-flow gradient is shown with a dashed line (right y-axis). Focusing time was 5 min.  $V_0$  is the void peak. B) Protein composition of the major peak. Protein components of  $\phi 6$  NC are indicated on the right.

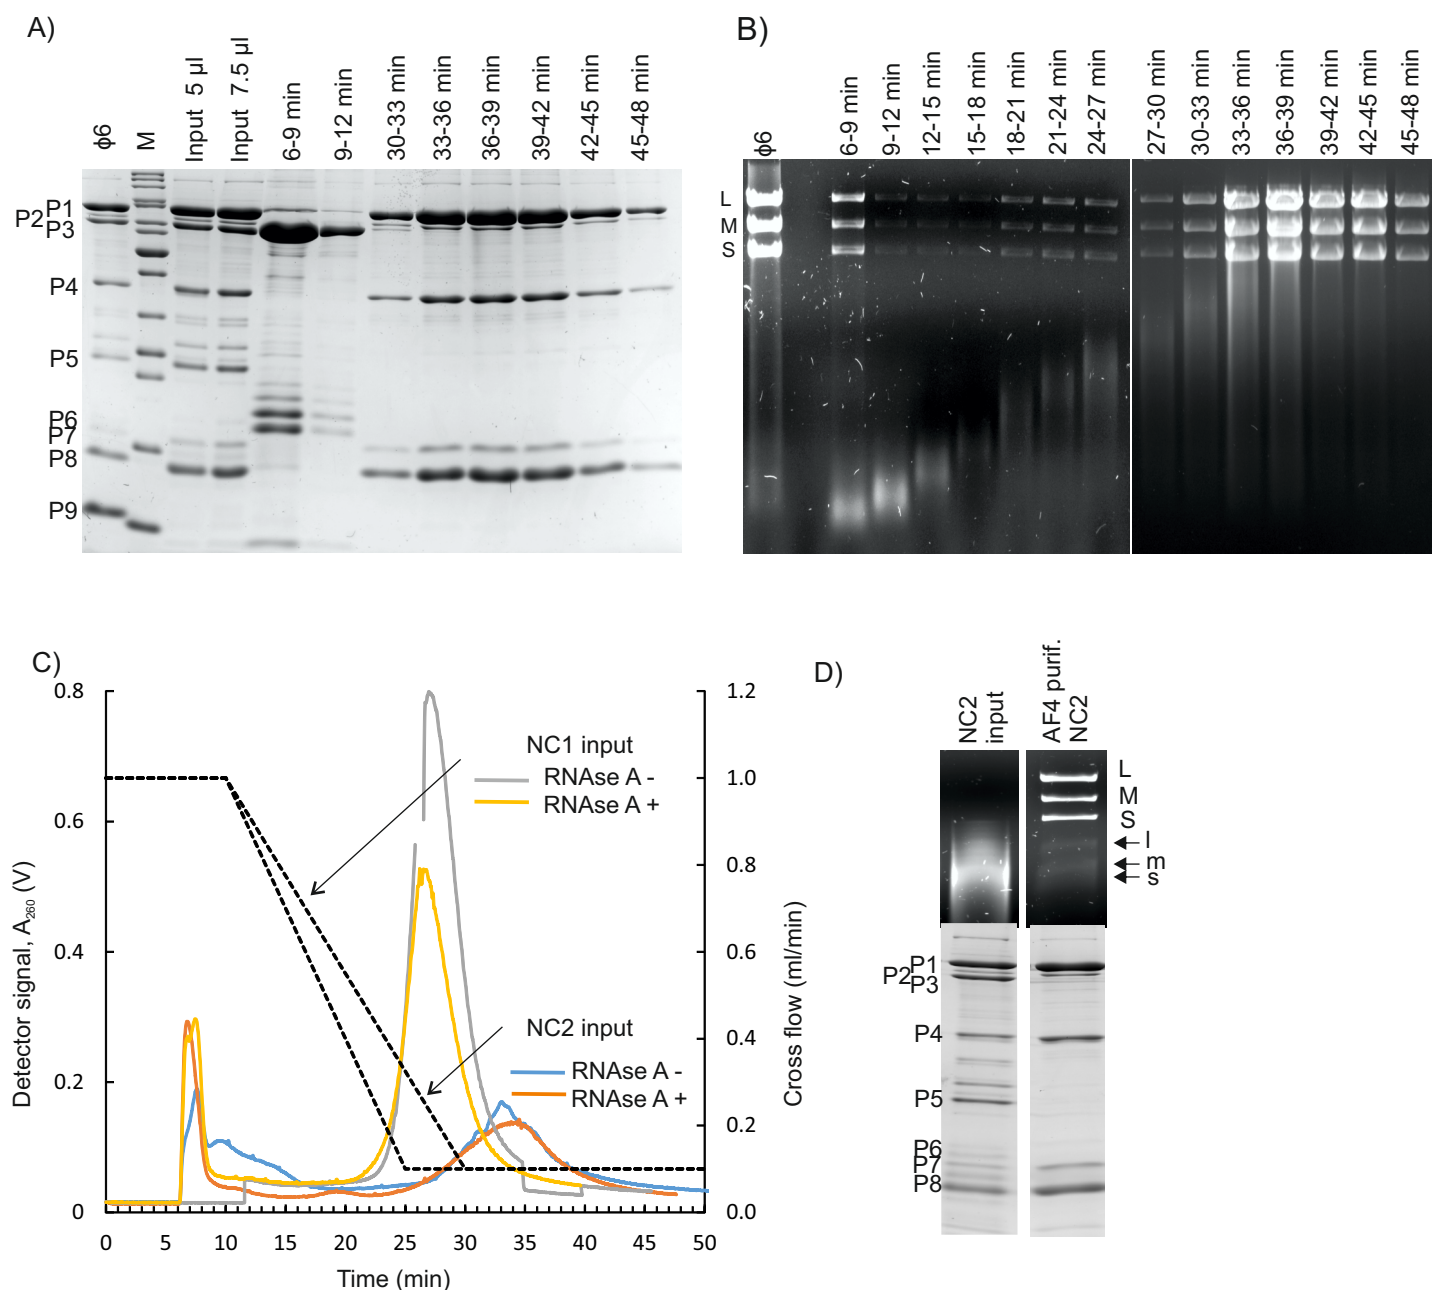

Supplementary Fig. S6. Purification of  $\phi 6$  NC by AF4. A) Protein and B) RNA content of fractions from purifications where NC2 was used as input. See Fig. 3A for the corresponding fractogram. C) AF4 fractograms for RNase A- and non-treated  $\phi 6$  NC. RNase A (50  $\mu$ g) treatment was performed for 25 min at RT. Note that a shorter cross-flow gradient was applied for NC1 input (grey and yellow lines) that resulted in earlier elution of purified NC. D) Transcription assay for the RNase A-treated NC2 input and the corresponding AF4-purified NC reveals successful removal of RNase A during AF4 (upper part), whereas protein analysis shows that  $\phi 6$  envelope proteins were successfully removed from the AF4-purified NC.  $\phi 6$  proteins and RNA segments are indicated. M shows the migration pattern of Thermo Scientific PageRuler Unstained Protein Ladder #26614 (10 to 200 kDa).

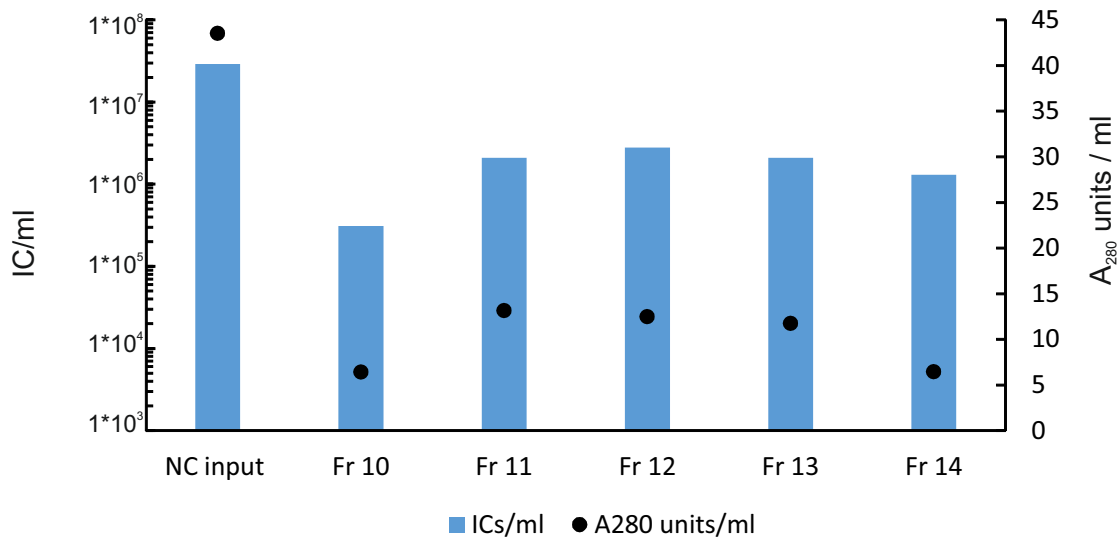

Supplementary Fig. 7. Capacity of AF4-purified  $\phi 6$  NC to infect spheroplasts. As NC lacks the lipid envelope, spheroplasts were used to assay the capacity of the AF4 purified NC2 input to program the replication of  $\phi 6$  and subsequent formation of infectious viruses (columns, left y-axis). Detection limit was  $1 \times 10^3$  IC/ml. Corresponding  $A_{280}$  units (dots) of the NC containing fractions are shown on the right y-axis.
